# Supplementary material for: Zein Nanoparticles Containing Arginine-Phenylalanine-Based Surfactants: Stability, Antimicrobial and Hemolytic Activity
Source: MDPI journal article supplement (doi:10.3390/nano13010200), 2023-01-02
Supplement: s1 [file s1]

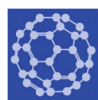

# Zein Nanoparticles Containing Arginine-Phenylalanine-Based Surfactants: Stability, Antimicrobial and Hemolytic Activity

Lourdes Perez <sup>1,\*</sup>, Zakaria Hafidi <sup>1</sup>, Aurora Pinazo <sup>1</sup>, Maria Teresa García <sup>1</sup>, Manuel Martín-Pastor <sup>2</sup>  
and Francisco Fábio Oliveira de Sousa <sup>3,\*</sup>

<sup>1</sup> Department of Surfactants and Nanobiotechnology, Institute for Advanced Chemistry of Catalonia (IQAC-CSIC), 08034 Barcelona, Spain; zakariahafidi21@gmail.com (Z.H.); aurora.pinazo@iqac.csic.es (A.P.); teresa.garcia@iqac.csic.es (M.T.G.)

<sup>2</sup> Unidad de Resonancia Magnética, Área de Infraestructuras de Investigación, Universidad de Santiago de Compostela, Santiago de Compostela, 15782 A Coruña, Spain; manuel.martin@usc.es

<sup>3</sup> School of Pharmacy, Department of Biological & Health Sciences, Federal University of Amapa, Macapa 68903-419, Brazil

\* Correspondence: lourdes.perez@iqac.csic.es (L.P.); fabio@unifap.br (F.F.O.d.S.)

**Table S1.** Results of interaction details and docking score in (kJ/mol) of LAM ligand complexed in different binding sites on the surfaces on the zein structures (Q9SYT3\_MAIZE).

| Docking Score | Pocket | Ligand            | Receptor Pocket | Interactions type | Interactions category      | Distance (Å) |
|---------------|--------|-------------------|-----------------|-------------------|----------------------------|--------------|
| -7.3          | 1      | H(N+H2 Guanidine) | PRO170          | Hydrogen Bond     | Conventional Hydrogen Bond | 2.97432      |
|               |        | H(N+H2 Guanidine) | PRO170          | Hydrogen Bond     | Conventional Hydrogen Bond | 2.79542      |
|               |        | C(CH)             | SER160          | Hydrogen Bond     | Carbon Hydrogen Bond       | 3.04949      |
|               |        | C(OCH3)           | GLN205          | Hydrogen Bond     | Carbon Hydrogen Bond       | 3.23101      |
| -6.9          | 2      | C(CH3)            | ALA184          | Hydrophobic       | Alkyl                      | 3.65242      |
| -7.3          | 3      | H(N+H2 Guanidine) | PRO170          | Hydrogen Bond     | Conventional Hydrogen Bond | 2.97888      |
|               |        | H(N+H2 Guanidine) | PRO170          | Hydrogen Bond     | Conventional Hydrogen Bond | 2.77512      |
|               |        | C(CH)             | SER160          | Hydrogen Bond     | Carbon Hydrogen Bond       | 3.08053      |
|               |        | C(OCH3)           | GLN205          | Hydrogen Bond     | Carbon Hydrogen Bond       | 3.23649      |
| -7.8          | 4      | O(C=O)            | HIS80           | Hydrogen Bond     | Carbon Hydrogen Bond       | 3.17117      |
|               |        | C(CH3)            | LEU110          | Hydrophobic       | Alkyl                      | 4.41005      |
|               |        | C(CH3)            | LEU114          | Hydrophobic       | Alkyl                      | 4.79395      |
| -7.3          | 5      | H(N+H2 Guanidine) | PRO170          | Hydrogen Bond     | Conventional Hydrogen Bond | 3.0087       |

|      |   |                   |        |               |                            |         |
|------|---|-------------------|--------|---------------|----------------------------|---------|
| -7.8 | 6 | H(N+H2 Guanidine) | PRO170 | Hydrogen Bond | Conventional Hydrogen Bond | 2.83475 |
|      |   | C(CH)             | SER160 | Hydrogen Bond | Carbon Hydrogen Bond       | 3.06283 |
|      |   | C(OCH3)           | GLN205 | Hydrogen Bond | Carbon Hydrogen Bond       | 3.25599 |
|      |   | C(OCH3)           | GLN90  | Hydrogen Bond | Carbon Hydrogen Bond       | 3.61402 |
|      |   | C(CH3)            | ILE83  | Hydrophobic   | Alkyl                      | 4.7638  |
|      |   | H(NH)             | ASN20  | Hydrogen Bond | Conventional Hydrogen Bond | 1.83877 |
| -6.1 | 7 | H(N+H2 Guanidine) | THR19  | Hydrogen Bond | Conventional Hydrogen Bond | 2.49037 |
|      |   | C(CH3)            | LEU12  | Hydrophobic   | Alkyl                      | 5.30679 |
|      |   | C(CH3)            | PHE15  | Hydrophobic   | Pi-Alkyl                   | 4.35607 |

**Table S2.** Results of interaction details and docking score in (kJ/mol) of PNHC<sub>12</sub> ligand complexed in different binding sites on the surfaces on the zein structures (Q9SYT3\_MAIZE).

| Docking Score | Pocket | Ligand  | Receptor Pocket | Interactions type | Interactions category      | Distance (Å) |
|---------------|--------|---------|-----------------|-------------------|----------------------------|--------------|
| -6.4          | 1      | Ring    | LEU177          | Hydrophobic       | Pi-Sigma                   | 3.95701      |
|               |        | C(CH3)  | ALA123          | Hydrophobic       | Alkyl                      | 3.69688      |
|               |        | C(CH3)  | ALA169          | Hydrophobic       | Alkyl                      | 4.48497      |
|               |        | C(CH3)  | LEU164          | Hydrophobic       | Alkyl                      | 4.52804      |
| -6.2          | 2      | H(N+H3) | SER162          | Hydrogen Bond     | Conventional Hydrogen Bond | 1.96179      |
|               |        | H(N+H3) | LEU159          | Hydrogen Bond     | Conventional Hydrogen Bond | 2.54609      |
|               |        | H(N+H3) | LEU159          | Hydrogen Bond     | Conventional Hydrogen Bond | 2.99719      |
|               |        | O(C=O)  | SER160          | Hydrogen Bond     | Carbon Hydrogen Bond       | 3.33147      |
|               |        | C(CH3)  | ALA126          | Hydrophobic       | Alkyl                      | 3.69262      |
|               |        | C(CH3)  | ALA127          | Hydrophobic       | Alkyl                      | 4.11668      |
|               |        | C(CH3)  | LEU164          | Hydrophobic       | Alkyl                      | 4.00228      |
|               |        | Ring    | ALA165          | Hydrophobic       | Pi-Alkyl                   | 5.04013      |
|               |        | Ring    | PRO170          | Hydrophobic       | Pi-Alkyl                   | 4.52456      |
|               |        | Ring    | LEU177          | Hydrophobic       | Pi-Sigma                   | 3.78559      |
| -6.1          | 3      | Ring    | LEU177          | Hydrophobic       | Pi-Sigma                   | 3.79241      |
|               |        | C(CH3)  | ALA127          | Hydrophobic       | Alkyl                      | 4.0609       |
|               |        | C(CH3)  | LEU164          | Hydrophobic       | Alkyl                      | 3.96071      |
|               |        | C(CH3)  | LEU173          | Hydrophobic       | Alkyl                      | 4.61468      |
|               |        | Ring    | LEU177          | Hydrophobic       | Pi-Sigma                   | 3.96935      |
|               |        | C(CH3)  | ALA169          | Hydrophobic       | Alkyl                      | 4.14848      |
| -6.1          | 5      | C(CH3)  | LEU164          | Hydrophobic       | Alkyl                      | 4.00945      |
|               |        | H(N+H3) | SER160          | Hydrogen Bond     | Conventional Hydrogen Bond | 2.57972      |
|               |        | H(NH)   | SER160          | Hydrogen Bond     | Conventional Hydrogen Bond | 2.85029      |
|               |        | Ring    | LEU177          | Hydrophobic       | Pi-Sigma                   | 3.93429      |
|               |        | Ring    | LEU177          | Hydrophobic       | Pi-Sigma                   | 3.72676      |
|               |        | C(CH3)  | ALA127          | Hydrophobic       | Alkyl                      | 3.92817      |
|               |        | C(CH3)  | ALA169          | Hydrophobic       | Alkyl                      | 4.40679      |

|      |   |         |        |               |                            |         |
|------|---|---------|--------|---------------|----------------------------|---------|
| -5.3 | 6 | C(CH3)  | PRO170 | Hydrophobic   | Alkyl                      | 4.69182 |
|      |   | C(CH3)  | LEU173 | Hydrophobic   | Alkyl                      | 4.20458 |
|      |   | Ring    | TYR128 | Hydrophobic   | Pi-Pi Stacked              | 3.73648 |
|      |   | C(CH3)  | ILE83  | Hydrophobic   | Alkyl                      | 4.01167 |
|      |   | Ring    | ALA87  | Hydrophobic   | Pi-Alkyl                   | 4.57961 |
|      |   | H(N+H3) | ALA54  | Hydrogen Bond | Conventional Hydrogen Bond | 2.17001 |
| -4.3 | 7 | H(N+H3) | GLN58  | Hydrogen Bond | Conventional Hydrogen Bond | 1.85122 |
|      |   | C(CH2)  | ASN20  | Hydrogen Bond | Carbon Hydrogen Bond       | 3.4593  |
|      |   | Ring    | LEU57  | Hydrophobic   | Amide-Pi Stacked           | 4.68191 |
|      |   | C(CH3)  | LEU57  | Hydrophobic   | Alkyl                      | 3.99966 |
|      |   | Ring    | LEU61  | Hydrophobic   | Pi-Alkyl                   | 4.94572 |
|      |   |         |        |               |                            |         |

**Table S3.** Results of interaction details and docking score in (kJ/mol) of C<sub>12</sub>PAM ligand complexed in different binding sites on the surfaces on the zein structures (Q9SYT3\_MAIZE).

| Docking Score | Pocket | Ligand                               | Receptor Pocket | Interactions type | Interactions category      | Distance (Å) |
|---------------|--------|--------------------------------------|-----------------|-------------------|----------------------------|--------------|
| -7.2          | 1      | O(C=O)                               | ASN124          | Hydrogen Bond     | Conventional Hydrogen Bond | 2.43402      |
|               |        | H(NH)                                | ASN124          | Hydrogen Bond     | Conventional Hydrogen Bond | 2.48521      |
|               |        | H(NH2 Guanidine)                     | ASN124          | Hydrogen Bond     | Conventional Hydrogen Bond | 2.25149      |
|               |        | H(N+H2 Guanidine)                    | ALA169          | Hydrogen Bond     | Conventional Hydrogen Bond | 1.82756      |
|               |        | Ring                                 | LEU120          | Hydrophobic       | Pi-Alkyl                   | 4.99389      |
| -7.9          | 2      | C(CH <sub>3</sub> )                  | LEU164          | Hydrophobic       | Alkyl                      | 4.66388      |
|               |        | C(CH3)                               | PRO170          | Hydrophobic       | Alkyl                      | 4.54668      |
|               |        | C(CH3)                               | LEU173          | Hydrophobic       | Alkyl                      | 4.29757      |
|               |        | Ring                                 | LEU159          | Hydrophobic       | Pi-Alkyl                   | 5.28949      |
|               |        | C(CH3)                               | LEU177          | Hydrophobic       | Alkyl                      | 5.2232       |
| -7.9          | 3      | C(CH3)                               | PHE203          | Hydrophobic       | Pi-Alkyl                   | 4.47273      |
|               |        | Ring                                 | ALA165          | Hydrophobic       | Pi-Alkyl                   | 3.86353      |
|               |        | Ring                                 | ALA121          | Hydrophobic       | Pi-Sigma                   | 3.6446       |
| -7.4          | 4      | Ring                                 | LEU114          | Hydrophobic       | Pi-Alkyl                   | 4.73884      |
|               |        | O(C=O)                               | GLN205          | Hydrogen Bond     | Conventional Hydrogen Bond | 2.42986      |
| -8.2          | 5      | H(NH2 Guanidine)                     | SER160          | Hydrogen Bond     | Conventional Hydrogen Bond | 2.87177      |
|               |        | O(C=O)                               | SER161          | Hydrogen Bond     | Carbon Hydrogen Bond       | 3.457        |
|               |        | Ring                                 | PRO202          | Hydrophobic       | Pi-Alkyl                   | 4.95903      |
|               |        | O(C=O)                               | GLN132          | Hydrogen Bond     | Conventional Hydrogen Bond | 2.23862      |
| -7.4          | 6      | C(CH <sub>2</sub> Hydrophobic alkyl) | TYR109          | Hydrophobic       | Pi-Sigma                   | 3.67581      |
|               |        | Ring                                 | ALA87           | Hydrophobic       | Pi-Alkyl                   | 4.1366       |
|               |        | H(NH2 Guanidine)                     | THR19           | Hydrogen Bond     | Conventional Hydrogen Bond | 2.92367      |
| -7.9          | 7      | H(NH2 Guanidine)                     | THR19           | Hydrogen Bond     | Conventional Hydrogen Bond | 2.74286      |
|               |        | H(NH2 Guanidine)                     | ASN20           | Hydrogen Bond     | Conventional Hydrogen Bond | 2.48226      |
|               |        | Ring                                 | LEU57           | Hydrophobic       | Pi-Sigma                   | 3.91688      |
|               |        |                                      |                 |                   |                            |              |

|      |       |             |          |         |
|------|-------|-------------|----------|---------|
| Ring | LEU61 | Hydrophobic | Pi-Alkyl | 4.81839 |
|------|-------|-------------|----------|---------|

**Table S4.** Results of interaction details and docking score in (kJ/mol) of PANHC<sub>12</sub> ligand complexed in different binding sites on the surfaces on the zein structures (Q9SYT3\_MAIZE).

| Docking Score | Pocket | Ligand           | Receptor Pocket | Interactions type | Interactions category      | Distance (Å) |
|---------------|--------|------------------|-----------------|-------------------|----------------------------|--------------|
| -9            | 1      | O(C=O)           | THR207          | Hydrogen Bond     | Conventional Hydrogen Bond | 1.83822      |
|               |        | O(C=O)           | THR207          | Hydrogen Bond     | Conventional Hydrogen Bond | 1.7741       |
|               |        | H(N+H3 )         | GLN205          | Hydrogen Bond     | Conventional Hydrogen Bond | 2.25351      |
| -7.7          | 2      | H(NH2 Guanidine) | SER162          | Hydrogen Bond     | Conventional Hydrogen Bond | 2.18277      |
|               |        | H(NH2 Guanidine) | SER161          | Hydrogen Bond     | Conventional Hydrogen Bond | 2.81668      |
|               |        | H(NH)            | LEU158          | Hydrogen Bond     | Conventional Hydrogen Bond | 2.27105      |
|               |        | H(N+H3 )         | GLN133          | Hydrogen Bond     | Conventional Hydrogen Bond | 1.86787      |
|               |        | Ring             | PHE137          | Hydrophobic       | Pi-Pi T-shaped             | 5.39863      |
|               |        | C(CH3)           | PRO119          | Hydrophobic       | Alkyl                      | 5.44349      |
|               |        |                  |                 |                   |                            |              |
| -9.1          | 3      | O(C=O)           | THR207          | Hydrogen Bond     | Conventional Hydrogen Bond | 1.82891      |
|               |        | O(C=O)           | THR207          | Hydrogen Bond     | Conventional Hydrogen Bond | 2.15488      |
|               |        | H(N+H3 )         | GLN205          | Hydrogen Bond     | Conventional Hydrogen Bond | 2.20747      |
| -9.1          | 4      | O(C=O)           | HIS80           | Hydrogen Bond     | Conventional Hydrogen Bond | 2.40394      |
|               |        | H(N+H3 )         | ASN124          | Hydrogen Bond     | Conventional Hydrogen Bond | 2.61522      |
|               |        | Ring             | ALA87           | Hydrophobic       | Pi-Sigma                   | 3.99029      |
| -6.8          | 5      | H(N+H3 )         | LEU225          | Hydrogen Bond     | Conventional Hydrogen Bond | 2.03435      |
|               |        | H(CH)            | GLU226          | Hydrogen Bond     | Carbon Hydrogen Bond       | 3.47424      |
|               |        | Ring             | LEU236          | Hydrophobic       | Pi-Sigma                   | 3.71367      |
|               |        | Ring             | LEU222          | Hydrophobic       | Pi-Alkyl                   | 5.47085      |
| -9.8          | 6      | Ring             | TYR128          | Hydrophobic       | Pi-Pi Stacked              | 3.85476      |
|               |        | Ring             | ALA87           | Hydrophobic       | Pi-Alkyl                   | 4.53503      |
|               |        | Ring             | VAL125          | Hydrophobic       | Pi-Alkyl                   | 5.28344      |
| -7.5          | 7      | O(C=O)           | PHE22           | Hydrogen Bond     | Conventional Hydrogen Bond | 2.16811      |
|               |        | C(CH3)           | ALA253          | Hydrophobic       | Alkyl                      | 3.55668      |
|               |        | Ring             | ALA54           | Hydrophobic       | Pi-Alkyl                   | 5.25214      |
|               |        | Ring             | LEU57           | Hydrophobic       | Pi-Alkyl                   | 4.33549      |

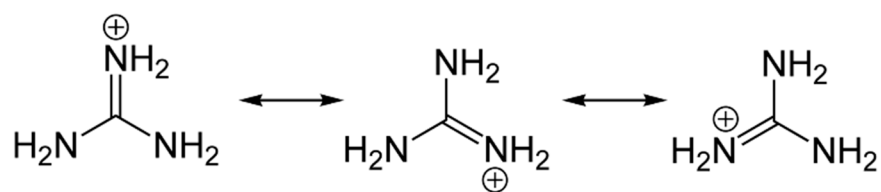

**Figure S1.** Canonical forms of guanidine group.
